# Supplementary material
Source: MDPI journal article supplement (https://www.mdpi.com/1420-3049/27/19/6497)
Supplement: s1 [file s1]

Archive with 1 entries (1 files):
- Supplementary Information.pdf
